# Supplementary material
Source: publisher figshare collection journal article supplement (https://acs.figshare.com/ndownloader/files/5171599)
Supplement: Supplementary file 1 [file 5171599]

# Supporting information

for

## Preparation and Characterization of Cs<sub>2.8</sub>H<sub>1.2</sub>PMo<sub>11</sub>Fe(H<sub>2</sub>O)O<sub>39</sub>·6H<sub>2</sub>O and Investigation of Effects of Iron-substitution on Heterogeneous Oxidative Dehydrogenation of 2-Propanol

Noritaka Mizuno, Joon-Seok Min, and Akira Taguchi

**Table S1.** Crystallographic data and results of refinement for [C<sub>6</sub>H<sub>5</sub>(CH<sub>3</sub>)<sub>3</sub>N]<sub>5</sub>[PMo<sub>11</sub>{Fe(Cl)}O<sub>39</sub>]·CH<sub>3</sub>CN·H<sub>2</sub>O

|                                             |                                                                                                                                            |
|---------------------------------------------|--------------------------------------------------------------------------------------------------------------------------------------------|
| Empirical formula                           | C <sub>47</sub> H <sub>75</sub> N <sub>6</sub> O <sub>40</sub> ClFeMo <sub>11</sub> P                                                      |
| Formula weight                              | 2539.72                                                                                                                                    |
| Temperature                                 | 20 (2) °C                                                                                                                                  |
| Wavelength                                  | 0.71069 Å                                                                                                                                  |
| Crystal shape                               | prismatic                                                                                                                                  |
| Crystal color                               | yellow                                                                                                                                     |
| Crystal size                                | 0.35 × 0.30 × 0.30 mm                                                                                                                      |
| Crystal system, space group                 | triclinic, $P\bar{1}$                                                                                                                      |
| Unit cell dimensions                        | $a = 15.103(5)$ Å $\alpha = 100.20(3)^\circ$<br>$b = 20.708(5)$ Å $\beta = 116.55(2)^\circ$<br>$c = 14.834(6)$ Å $\gamma = 81.07(3)^\circ$ |
| Volume                                      | 4069(2) Å <sup>3</sup>                                                                                                                     |
| Absorption coefficient                      | 1.945 mm <sup>-1</sup>                                                                                                                     |
| $F(000)$                                    | 2474                                                                                                                                       |
| $\theta$ range for data collection          | 2.59 to 30.02°                                                                                                                             |
| Data collection method                      | $\omega$ -2 $\theta$                                                                                                                       |
| Transmission factors                        | 0.9384 – 1.0000                                                                                                                            |
| Final $R$ values ( $F_0 > 4.0\sigma(F_0)$ ) | $R1 = 0.0675$ , $wR2 = 0.1848$                                                                                                             |
| Final $R$ values (all data) <sup>a</sup>    | $R1 = 0.1853$ , $wR2 = 0.2286$                                                                                                             |
| Goodness of fit on $F^2$                    | 1.036                                                                                                                                      |
| Extinction coefficient <sup>b</sup>         | 0.0004(1)                                                                                                                                  |
| Index ranges                                | $-18 \leq h \leq 21$ , $-28 \leq k \leq 29$ , $-20 \leq l \leq 0$                                                                          |

$$^a R1 = \frac{\sum ||F_o| - |F_c||}{\sum |F_o|}, \quad wR2 = \left\{ \frac{\sum [w(F_o^2 - F_c^2)^2]}{\sum [w(F_o^2)^2]} \right\}^{1/2}; \quad w = \frac{1}{[\sigma^2(F_o^2) + (0.1071P)^2 + 1.4837P]} \quad (P = [0.3333(0, F_o^2)_{\max} + 0.6667F_c^2]).$$

$$^b F_c \text{ is multiplied by } k[1 + 0.0003590e^{Fc^2/\sin(2\theta)}]^{-1/4} \text{ where } k \text{ is overall scale.}$$

**Table S2.** Acidity of catalysts<sup>a</sup>

| Catalyst                                                                      | Acidity             |                          |
|-------------------------------------------------------------------------------|---------------------|--------------------------|
|                                                                               | Amount <sup>b</sup> | Temp. range <sup>c</sup> |
| <b>I</b>                                                                      | 170                 | 100 - 560                |
| Fe <sup>3+</sup> (1.3wt%)/Cs <sub>3.0</sub> PMo <sub>12</sub> O <sub>40</sub> | 90                  | 100 - 510                |
| Fe <sup>3+</sup> (2.5wt%)/Cs <sub>3.0</sub> PMo <sub>12</sub> O <sub>40</sub> | 150                 | 100 - 520                |
| Cs <sub>3.0</sub> PMo <sub>12</sub> O <sub>40</sub>                           | trace               | -                        |

<sup>a</sup> Acidic properties of the catalysts were measured by temperature programmed desorption (TPD) of NH<sub>3</sub> by a TPD system equipped with a quadrupole mass spectrometer (Multitask TPD, BEL Japan Inc.). Catalysts (80 mg) were treated in a He flow at 200 °C for 2 h, and NH<sub>3</sub> was adsorbed at the partial pressure of 1.33 kPa and 100 °C. After the excess NH<sub>3</sub> was flushed in a He flow at 100 °C for 1 h, the sample was heated up to 800 °C at a rate of 10 °C min<sup>-1</sup>. Mass numbers (*m/z*) of 16, 17, and 28 were used for the detection of amounts of NH<sub>3</sub> and N<sub>2</sub>.

<sup>b</sup> Amount of ammonia desorbed / μmol g<sup>-1</sup>.

<sup>c</sup> Temperature range of ammonia desorbed / °C.

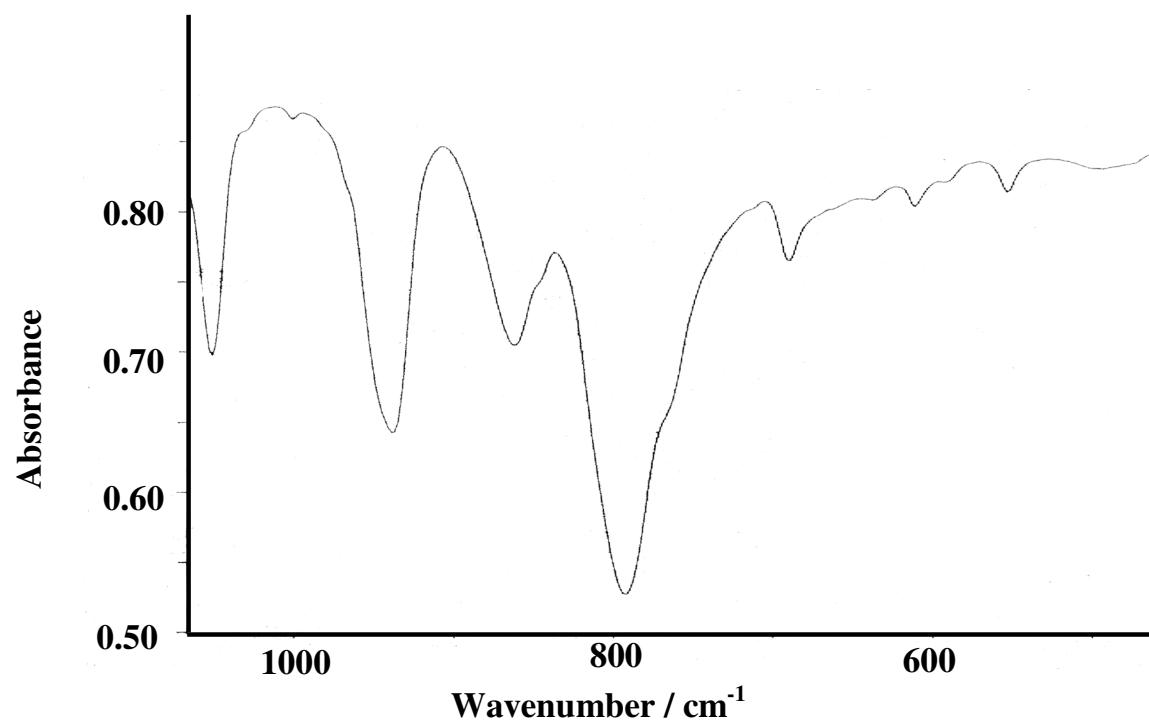

**Figure S1.** IR spectrum of  $[\text{C}_6\text{H}_5(\text{CH}_3)_3\text{N}]_5[\text{PMo}_{11}\{\text{Fe}(\text{Cl})\}\text{O}_{39}]\cdot\text{CH}_3\text{CN}\cdot\text{H}_2\text{O}(\text{KBr})$ .

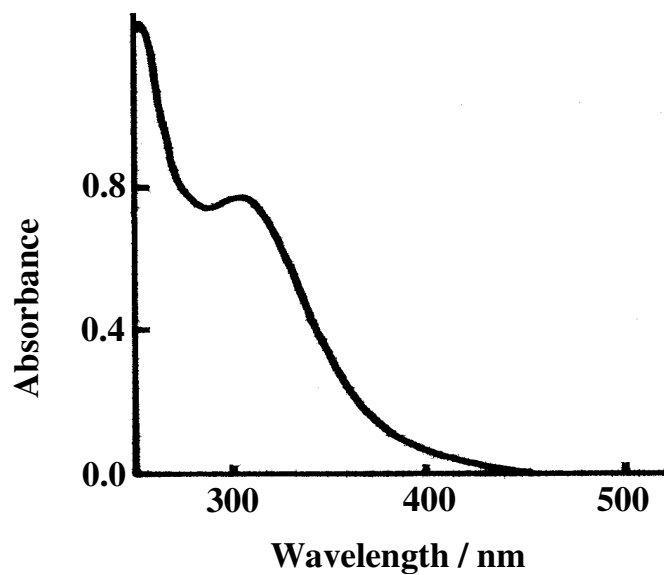

**Figure S2.** UV-vis spectrum of  $[\text{C}_6\text{H}_5(\text{CH}_3)_3\text{N}]_5[\text{PMo}_{11}\{\text{Fe}(\text{Cl})\}\text{O}_{39}]\cdot\text{CH}_3\text{CN}\cdot\text{H}_2\text{O}$  in acetonitrile/dimethylsulfoxide ( $v/v = 7/3$ ).

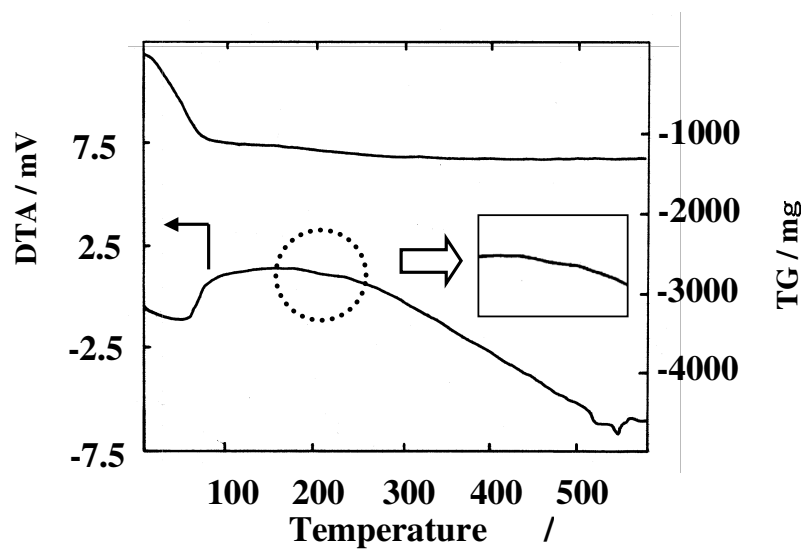

**Figure S3.** TG/DTA profile of  $\text{Cs}_{2.8}\text{H}_{1.2}[\text{PMo}_{11}\{\text{Fe}(\text{H}_2\text{O})\}\text{O}_{39}] \cdot 6\text{H}_2\text{O}$ .
